1 **Title:** Whole-genome fingerprint of the DNA methylome during chemically induced

2 differentiation of the human AML cell line HL-60/S4

3

4 **Running title:** DNAm of HL-60/S4 differentiation

5

6 **Authors:** Enoch Boasiako Antwi<sup>1,2</sup>, Ada Olins<sup>3</sup>, Vladimir B Teif<sup>4</sup>, Matthias Bieg<sup>1,5,7</sup>, Tobias

7 Bauer<sup>1,5</sup>, Zuguang Gu<sup>1,5</sup>, Benedikt Brors<sup>6</sup>, Roland Eils<sup>1,5,7,8</sup>, Donald Olins<sup>3</sup>, Naveed Ishaque<sup>1,5,7,\*</sup>

8

9 **Affiliations:**

10 <sup>1</sup> Division of Theoretical Bioinformatics, German Cancer Research Center (DKFZ), Heidelberg,  
11 Germany.

12 <sup>2</sup> Molecular and Cellular Engineering, Centre for Biological Signalling Studies, Freiburg  
13 University, Germany.

14 <sup>3</sup> Department of Pharmaceutical Sciences, College of Pharmacy, University of New England,  
15 Portland, ME USA.

16 <sup>4</sup> School of Biological Sciences, University of Essex, Colchester, UK

17 <sup>5</sup> Germany Heidelberg Center for Personalized Oncology (DKFZ-HIPO), German Cancer  
18 Research Center (DKFZ), Heidelberg, Germany

19 <sup>6</sup> Division of Applied Bioinformatics, German Cancer Research Center (DKFZ), Heidelberg,  
20 Germany

21 <sup>7</sup> Center for Digital Health, Berlin Institute of Health and Charité - Universitätsmedizin Berlin,  
22 Kapelle-Ufer 2, 10117, Berlin, Germany

23 <sup>8</sup> Translational Lung Research Center Heidelberg (TLRC), German Center for Lung Research  
24 (DZL), University of Heidelberg, Heidelberg, Germany

25

26 **Corresponding Author:** \* Naveed Ishaque, [naveed.ishaque@charite.de](mailto:naveed.ishaque@charite.de)

27

28 **Keywords:** DNA Methylation, Promyelocyte, Granulocyte, Macrophage, Differentiation,

29 Epigenetics, Enhancer, Promoter, Multi-omics correlation

30 **Summary statement**

31 Epigenomics plays a major role in cell identity and differentiation. We present the DNA  
32 methylation landscape of leukemic cells during in-vitro differentiation, to add another 'omics  
33 layer to better understand the mechanisms behind differentiation.

34 **Abstract**

35 Background: Myeloid differentiation gives rise to a plethora of immune cells in the human body.  
36 This differentiation leaves strong signatures in the epigenome through each differentiated state  
37 of genetically identical cells. The leukemic HL-60/S4 promyelocytic cell can be easily  
38 differentiated from its undifferentiated promyelocyte state into neutrophil- and macrophage-like  
39 cell states, making it an excellent system for studying myeloid differentiation. In this study, we  
40 present the underlying genome and epigenome architecture of HL-60/S4 through its  
41 undifferentiated and differentiated cell states.

42

43 Results: We performed whole genome bisulphite sequencing of HL-60/S4 cells and their  
44 differentiated counterparts. With the support of karyotyping, we show that HL-60/S4 maintains a  
45 stable genome throughout differentiation. Analysis of differential CpG methylation reveals that  
46 most methylation changes occur in the macrophage-like state. Differential methylation of  
47 promoters was associated with immune related terms. Key immune genes, CEBPA, GF11,  
48 MAFB and GATA1 showed differential expression and methylation. However, we observed  
49 strongest enrichment of methylation changes in enhancers and CTCF binding sites, implying  
50 that methylation plays a major role in large scale transcriptional reprogramming and chromatin  
51 reorganisation during differentiation. Correlation of differential expression and distal methylation  
52 with support from chromatin capture experiments allowed us to identify putative proximal and  
53 long-range enhancers for a number of immune cell differentiation genes, including CEBPA and  
54 CCNF. Integrating expression data, we present a model of HL-60/S4 differentiation in relation to  
55 the wider scope of myeloid differentiation.

56

57 Conclusions: For the first time, we elucidate the genome and CpG methylation landscape of  
58 HL-60/S4 during differentiation. We identify all differentially methylated regions and positions.  
59 We link these to immune function and to important factors in myeloid differentiation. We  
60 demonstrate that methylation plays a more significant role in modulating transcription via  
61 enhancer reprogramming, rather than by promoter regulation. We identify novel regulatory  
62 regions of key components in myeloid differentiation that are regulated by differential

- 63 methylation. This study contributes another layer of “omics” characterisation of the HL-60/S4
- 64 cell line, making it an excellent model system for studying rapid *in vitro* cell differentiation.

## 65 Introduction

66 Gene expression profiles differ among different cell types and change as stem cells differentiate  
67 (Cheng *et al.*, 1996; Le Naour *et al.*, 2001; Natarajan *et al.*, 2012). Genome wide CpG  
68 methylation, an epigenetic regulation and modification process, has been shown to exhibit  
69 similar dynamic behaviour during differentiation (Brunner *et al.*, 2009; Bock *et al.*, 2012).  
70 Usually, these two changes (i.e., gene expression and CpG methylation) have been shown to  
71 correlate negatively with each other, depending upon the location of the methylated CpG  
72 relative to the gene body (Payer *et al.*, 2008; Chuang, Chen and Chen, 2012; Jones, 2012;  
73 Yang *et al.*, 2014). Overall, changes in methylation patterns between cell types and tissues  
74 throughout life, work to either activate or shut down specific cellular processes (Smith &  
75 Meissner, 2013), making cells exhibit different phenotypic characteristics. Acting as a  
76 shutdown mechanism, DNA methylation reinforces gene silencing, when expression is not  
77 required in a particular cell type (Lock, et al., 1987).

78

79 Normal myeloid cell differentiation occurs within the bone marrow, where stroma cells secrete  
80 cytokines to help activate myeloid-specific gene transcription (De Kleer, et al., 2014). Further  
81 differentiation can occur in the peripheral tissues or blood, dependent upon exposure of the  
82 myeloid precursors to cytokines and other factors, such as antigens (Geissmann *et al.*, 2010;  
83 Álvarez-Errico *et al.*, 2015). The first direct committed step toward myeloid cell development is  
84 the differentiation of multipotent progenitors (MPP) cells into common myeloid progenitor cells  
85 (CMP) (Kondo, et al., 1997), (Alvarez-Errico, et al., 2015). CMP cells can then differentiate  
86 further into the granulocyte-macrophage lineage progenitor (GMP) and megakaryocyte-  
87 erythroid progenitor (MEP) (Iwasaki & Akashi, 2007). While CMP cells can differentiate into all  
88 myeloid cell types, GMP cells give rise mainly to monocytes/macrophages and neutrophils,  
89 together with a minor population of eosinophils, basophils and mast cells (Laiosa, et al., 2006),  
90 (Iwasaki & Akashi, 2007), (Alvarez-Errico, et al., 2015).

91

92 The human myeloid leukemic cell line HL-60/S4 is an excellent system to study epigenetic  
93 changes during chemically induced in vitro cell differentiation. HL-60/S4 cells are supposedly  
94 blocked at the GMP cell state and unable to differentiate any further. The HL-60/S4 cell line is a

95 subline of HL-60 and demonstrates “faster” cell differentiation than the parent HL-60 cells.

96 Undifferentiated HL-60/S4 cells exhibit a myeloblastic or promyelocytic morphology with a

97 rounded nucleus containing 2 to 4 nucleoli, basophilic cytoplasm and azurophilic granules

98 (Birnie, 1988). Retinoic acid (RA) can induce HL-60/S4 differentiation to a granulocyte-like

99 state. 12-O-tetradecanoylphorbol-13-acetate (TPA) can induce differentiation to

100 monocyte/macrophage-like states (Fontana, Colbert and Deisseroth, 1981; Birnie, 1988).

101

102 The extent to which DNA methylation regulates these chemically induced differentiation

103 processes is not known. Likewise, the global genome wide methylation changes associated

104 with these differentiation processes have not been described. This study details the methylation

105 changes (and lack of changes), when HL-60/S4 is differentiated to granulocytes, employing RA,

106 and to macrophage, employing TPA. The information contained within this study is intended as

107 a sequel to previous studies that describe the transcriptomes (Mark Welch *et al.*, 2017),

108 nucleosome positioning (Teif *et al.*, 2017) and epichromatin properties (Olins *et al.*, 2014) of

109 HL-60/S4 cells differentiated under identical conditions. The goal is to integrate these different

110 lines of information into a comprehensive description and mechanistic analysis of the cell

111 differentiation pathways in the human myeloid leukemic HL-60/S4 cell lineage.

## 112 Results

113

114 Little or no DNA methylation changes are observed upon HL-60/S4 cell differentiation at the  
115 megabase scale

116 We performed whole genome bisulphite sequencing (WGBS) of HL-60/S4 in 3 different cell  
117 differentiation states: the undifferentiated state (UN), the retinoic acid treated granulocyte state  
118 (RA), and the tetradecanoyl phorbol acetate (TPA) treated macrophage state. Comparison of  
119 the whole genome coverage profiles for each of the three differentiation states of HL-60/S4  
120 revealed that the cell line is hypo-diploid (Mark Welch, Jauch, Langowski, Olins, & Olins, 2017)  
121 and is chromosomally stable throughout differentiation (Supplementary Figure S1 A-C). A  
122 comparison of HL-60/S4 cells (from 2008 and 2012) by fluorescent in situ hybridization (FISH)  
123 karyotyping showed that this cell line is also stable over long time periods (Supplementary  
124 Figure S1 D&E). From all the CpGs identified by WGBS on all three cell states, a total of  
125 21,974,649 (82.38%) CpGs had  $\geq 10x$  coverage (Table 1 and Table S1), which spanned the  
126 full range of methylation rates, from 0 (completely unmethylated) to 1 (fully methylated). Most of  
127 these CpGs are highly and fully methylated ( $> 0.75$  methylation rate), with only small sets of  
128 lowly and unmethylated CpGs ( $< 0.25$  methylation rate) and partially methylated CpGs  
129 (methylation rate from 0.25 to 0.75) (Figure 1 A and B). Principal component analysis of all  
130 CpGs with coverage greater than 10 revealed that the RA treated samples differed only slightly  
131 from the untreated sample, while the TPA samples had a much higher methylation variance,  
132 compared to the other two samples (Figure 1C). However, little or no methylation differences  
133 were observed among the 3 samples, when methylation rates were averaged over 10  
134 megabase (Mb) windows (Figure 1D).

135

136 The single CpG methylation landscape of TPA cells differ most, when compared to UN and RA  
137 Cells

138 Due to the small changes observed on the megabase scale, we focused on significantly  
139 differentially methylated single CpGs positions (DMPs) for further analysis. A total of 41,306  
140 unique CpGs were identified to be significantly differentially methylated (Fisher analysis, see  
141 Materials and Methods). These DMPs comprise of 12,713, 17,392 and 17,100 CpGs from the

142 comparisons of RA to UN cells, TPA to UN cells and RA to TPA cells, respectively (Figure 2A).  
143 A higher proportion of the DMPs identified in the comparison of TPA to UN cells were hyper-  
144 methylated; but a similar number of hyper- and hypo-methylated DMPs were observed in the  
145 RA to TPA cells comparison. Most of the hyper-methylated DMPs had a methylation rate shift  
146 from around 0 to 0.2; hypo-methylated DMPs showed a reverse shift of methylation rate (0.2 to  
147 0) (Figure 2C and D).

148

#### 149 [Enhancers are most enriched within DMPs](#)

150 The most enriched genomic features in the hyper-methylated DMPs were enhancers,  
151 transcription start sites (TSSs) of protein coding genes and CpG islands (CpGs) for both RA  
152 and TPA cells, compared to UN cells (Figure 2B). CTCF was enriched in TPA hyper-methylated  
153 DMPs, but not in RA. On the other hand, CpGs were also the most enriched feature in the  
154 hypo-methylated DMPs, when RA was compared to UN cells. Enhancers alone showed a high  
155 enrichment in both hyper-methylated and hypo-methylated DMPs, identified when TPA is  
156 compared to UN cells (Figure 2B). In contrast to enhancers, simple repeats, epichromatin, and  
157 LINE (long interspersed nuclear element) repeats were depleted within hyper- and hypo-  
158 methylated regions in both RA and TPA.

159

160 We identified clusters of DMP methylation pattern changes between the 3 cell states of HL-  
161 60/S4. We called these cluster “modules”. Module analysis reveals that enhancers are  
162 significantly enriched in DMPs that are hypo-methylated in the TPA state, relative to UN and RA  
163 (modules M6 and M12). The observed hypo-methylation for TPA treated cells corresponded  
164 with lower nucleosome occupancy around the DMPs of M6 and M12 (Supplementary Figure  
165 S2). M7 DMPs were similarly hypo-methylated in the TPA, compared to RA and UN cells, but  
166 with lower methylation differences (Figure 2E and F). Enrichment of exons, epichromatin and  
167 chromatin-interacting domains (Li Teng *et al.*, 2015) were also observed in module M6.

168

#### 169 [CpGs have a very dynamic differential methylation](#)

170 CpGs are differentially methylated, but mainly in relation to RA treated cells. CpGs were most  
171 enriched in module M1, which has DMPs that are hemi-methylated (approximated 0.5



172 methylation rate) in RA; but these DMPs showed lower methylation in TPA and UN cells.

173 Similar results were seen in module M9, where DMPs were hypo-methylated in RA, compared  
174 to TPA and UN cells. Likewise, CpG enrichment was observed for module M11, where DMPs  
175 are hyper-methylated in TPA, compared to RA and UN cells.

176

#### 177 [Methylation of transcription start site DMPs correlate weakly with gene expression](#)

178 A total of 110 and 132 genes were found to have their TSS overlapping with DMPs from RA  
179 and TPA cells compared to UN cells, respectively. These overlapping DMPs had a methylation  
180 rate difference of at least 0.2. RA genes showed a weak and insignificant correlation between  
181 the average methylation difference of the DMPs overlapping with the TSS and the  $-\log_2$  (RNA  
182 expression fold change) of genes (Figure 3A). This is confirmed by the comparable number of  
183 genes that have positive and negative correlation between TSS DMP methylation and gene  
184 expression (Figure 3B).

185

186 However, the scatter plot of TSS overlapping DMP methylation change and  $-\log_2$  (RNA  
187 expression fold change) does show a weak, but significant, negative correlation (Figure 3C) and  
188 a higher number of negatively correlating genes, compared to positively correlating ones  
189 (Figure 3D).

190

#### 191 [Methylation of long distance regulatory regions shows negative correlation with target gene](#) 192 [expression](#)

193 Methylation and expression of CEBPE (a major transcription factor involved in myeloid cell  
194 differentiation) shows a negative correlation at the 3' end of the gene; a region identified to be  
195 an enhancer in the ROADMAP epigenome project (Figure 4A) (Roadmap Epigenomics  
196 Consortium *et al.*, 2015). The downstream region of the CEBPE gene, containing the DMPs  
197 whose methylation has strong negative correlation with expression, has been shown through  
198 IMPET (integrated methods for predicting enhancer targets) and CHIA-PET (Chromatin  
199 Interaction Analysis by Paired-End Tag Sequencing) to interact with the upstream regions that  
200 spans part of the gene body and the TSS region (L. Teng *et al.*, 2015). No DMPs were  
201 observed overlapping the TSS of the CEBPE gene; hence, no correlation between TSS

202 methylation and expression is available. The RNA expression of CEBPE (as well as CCNF and  
203 PGP) in UN, RA, and TPA is shown in Figure 4B.

204

205 Furthermore, the RNA expression of the gene encoding for cyclin F, CCNF, (Figure 4D)  
206 correlates weakly with the methylation of DMPs (Figure 4F) that overlap with its gene and TSS.  
207 However, CCNF RNA expression has a strong negative correlation with DMPs overlapping the  
208 upstream region of the PGP gene, which encodes phosphoglycolate phosphatase (Figure 4E  
209 correlation\*). PGP RNA expression (Figure 4C) does not show a similar correlation. This region  
210 has also been identified by ROADMAP as an enhancer.

211

#### 212 [Functional annotation of DMPs are mostly immune response related](#)

213 Using DMPs with a methylation fold change greater than or equal to 2, we observed that  
214 immune response related cellular functions were the most enriched biological function for all the  
215 genes whose TSS overlapped with DMPs, when RA cells were compared to UN cells (Table 2).  
216 Similarly, genes with their TSS overlapping DMPs in TPA compared to UN cells, were also  
217 mostly related to (or involved with) phosphoproteins, signalling and defence responses,  
218 including chemotaxis (Table 3). Similar observations were made when DMPs were merged into  
219 DMRs and their functional associations tested in TPA, compared to UN cells (Table 5). For RA  
220 compared to UN cells, the functional annotation was general cell function related (Table 4).

221

#### 222 [Key myeloid differentiation transcription factors are differentially expressed](#)

223 From analysis of the expression and methylation profiles of important myeloid differentiation  
224 regulatory transcriptions factors, it was observed that CEBPA (Supplementary Figure S3 A&B)  
225 and GF11 (Supplementary Figure S3 C&D) may be required to maintain HL-60/S4 in the  
226 undifferentiated state (Figure 5). As such, downregulation of CEBPA is necessary for the further  
227 differentiation of HL-60/S4 to either the neutrophil-like or macrophage-like state. Meanwhile,  
228 SPI1 and CEBPB are upregulated in both differentiated states (Supplementary Figure S3 E&F  
229 and K&L).

230

231 Upregulation of CEBPE (Figure 4B) is seen in RA; whereas, it is downregulated in TPA,  
232 together with GF11. In TPA treated cells, MAFB is upregulated, although still at low levels  
233 (Supplementary Figure S3 G&H). GATA1 is also down-regulated in RA and upregulated in TPA  
234 treated cells (Supplementary Figure S3 I&J).

## 235 Discussion

236

### 237 Differential methylation during HL-60/S4 differentiation occurs over small regions

238 Only small differences in DNA methylation were observed during HL-60/S4 cell differentiation  
239 at the 10 Mb window scale (Figure 1 E). Despite the lack of large scale methylation changes  
240 during the induced differentiation of HL-60/S4 cells, we observed both hyper- and hypo-  
241 methylation of a large number of differentially methylated single CpGs (DMPs) with a mean  
242 difference in methylation rate of 0.2 (Figure 2 A, C and D). Interestingly, the methylation rates  
243 of most of the differentially methylated CpGs ranged from around 0 to 0.4, corresponding to the  
244 partially methylated or unmethylated CpGs (Figure 2 C and D). This explains why only very few  
245 differentially methylated CpGs could be identified, since CpGs with this methylation rate value  
246 range were globally very sparse.

247

### 248 The DNA methylation landscape of RA cells is closer to undifferentiated HL-60/S4 cells, than to 249 TPA treated cells

250 Despite the generally similar megabase-scale methylation landscape observed in all 3  
251 samples, they could be clearly distinguished using principal component analysis (Figure 1 C).  
252 Whereas TPA cells were seen to be very different from UN cells based on their whole genome  
253 methylation profiles, RA and UN cells were closely positioned on the axes of both principal  
254 component 1 and 2. Neutrophil methylation has already been shown to be only slightly, but  
255 significantly, different from the promyelocyte precursor cell methylation (Alvarez-Errico, et al.,  
256 2015). Thus, the small differences seen between RA (granulocyte-like) cells and the UN  
257 (promyelocytic) cell forms are consistent with that previous study.

258

### 259 Differential methylation is limited to a few CpGs with very low levels of methylation

260 A total of 41,306 CpGs were identified to be differentially methylated; a very small number  
261 compared to the genome wide CpG numbers. The numbers of differentially methylated CpGs  
262 identified by a comparison of TPA to RA and UN cells were very similar. The lowest numbers of  
263 differences of differentially methylated CpGs were seen in a RA comparison to UN cells (Figure  
264 2A). Hyper-methylated DMPs were only enriched in protein coding TSS and in CpGI and

265 Enhancers for both RA and TPA, compared to UN. However, CTCF sites were only enriched in  
266 hyper-methylated DMPs in the TPA-UN comparison (Figure 2B). Hypo-methylated DMPs were  
267 seldom enriched for any particular genomic feature, except for CpGI, which was enriched in the  
268 RA-UN comparison, while enhancers showed enrichment within the TPA-UN comparison.

269

270 Changes in gene expression profiles, regulated by enhancers, may play a major role in the  
271 differentiation of macrophage-like cells. Enhancers stand out from other genomic features for  
272 TPA differentiated cells, which are quite different from UN cells (Figure 1C). The DMP module  
273 (M6), which has full methylation of CpGs in UN and RA, but hypo-methylation in TPA, is the  
274 same module that shows the highest enhancer enrichment (Figure 2D&E). These observations  
275 emphasize the significance of hypo-methylation of enhancers in macrophage-like differentiation,  
276 as observed in TPA-treated cells. On the other hand, modules M1 and M4 which showed either  
277 hyper- and hypo-methylation, for RA compared to UN, showed little enrichment of any genomic  
278 features, except CpGI. This may suggest a fine tuning of expression for already active genes,  
279 while hypo-methylation of DMPs in module M6 hints at the activation of expression of genes  
280 that might not be expressed in UN or RA cells.

281

282 On a broader view, hypo-methylation of enhancers, epichromatin and chromatin interaction  
283 domains in TPA cells suggests a remodeling of the transcriptional regulatory circuits in this  
284 state, compared to the RA and UN cell states.

285

286 [Interplay of DNA CpG methylation and nucleosome occupancy is genomic context dependant](#)

287 In TPA cells we observed lower nucleosome occupancy and hypo-methylation around the  
288 DMPs of module M6 (Figure 2E and Supplementary Figure S2). This module was also enriched  
289 for enhancers (Figure 2F). Similar observations were made for modules M7 and M12, albeit  
290 with lower levels of methylation change, enhancer enrichment and differential nucleosome  
291 occupancy changes. In modules M8 and M11, we observe hyper-methylation in TPA cells but  
292 no increase in nucleosome occupancy. These modules had little or no enrichment of  
293 enhancers. Similarly, other modules with hypo-methylation for either UN (modules M5 and M10)  
294 or RA cells (M8 and M9) did not exhibit reduced nucleosome occupancy, nor were they

295 enriched in enhancers. This suggests that differential nucleosome occupancy that is associated  
296 with differential DNA methylation in our differentiation system occurs in the genomic context of  
297 enhancers. This is consistent with previous findings of changes of nucleosome occupancy and  
298 DNA methylation in regulatory genomics contexts of CTCF binding and promoters (Kelly *et al.*,  
299 2012) during cellular differentiation.

300

#### 301 [RA and TPA cells share only a few DMPs](#)

302 We identified 12 clusters of DMP patterns, which we grouped into modules. These modules  
303 revealed that most of the identified CpGs were differentially methylated only in TPA cells,  
304 compared to the other differentiated states (Figure 2 E). The first 6 modules describe CpGs that  
305 were differentially methylated in one cell state, by comparison to one other cell state; while the  
306 latter 6 modules are for CpGs that were differentially methylated in one cell state, compared to  
307 the other two cell states.

308

309 Since the differentiation of HL-60/S4 into the granulocyte-like or macrophage-like state is a  
310 branched process and not linear, the effects of most of the CpGs that are differentially  
311 methylated in one direction may not be important to the other differentiation direction; unless, of  
312 course, the effect on CpGs is required for the differentiation process. It is conceivable that the  
313 effects of differentially methylated CpGs in modules M7-12 may be related to cell differentiation  
314 in general, while those in modules M1-6 may be related to specific developments of the  
315 different cell states.

316

#### 317 [Both positive and negative correlations are observed comparing DNA methylation of TSS 318 regions and levels of gene expression](#)

319 Earlier reports suggested that methylation in the promoter and the first exon inversely  
320 correlated with gene expression (Brenet *et al.*, 2011; Jones, 2012). As such, it would be  
321 expected that in the HL-60/S4 cell differentiation system, DNA methylation in the TSS region of  
322 genes should correlate negatively with gene expression. However, we observed equal  
323 numbers of genes that showed either positive or negative correlation between TSS methylation  
324 and gene expression was about equal (Figure 3). This observation suggests that there are

325 additional epigenetic modifications required at gene promoters to regulating transcriptional  
326 activity (Ford *et al.*, 2017) or that gene expression is determined by the epigenetic state of  
327 multiple regulatory elements and not just the promoter (Ong and Corces, 2011).

328

329 [Long-range chromatin interactions play an important role in HL-60/S4 differentiation](#)

330 RNA expression of CEBPE exhibits a strong inverse correlation with differential methylation in  
331 a downstream region of the CEBPE gene. These regions have been shown to be interacting,  
332 employing CHIA-PET in the K562 leukemia cell line (Figure 4A) (Dunham *et al.*, 2012).

333

334 Similarly, a region within the promoter of PGP was identified to contain DMPs which correlated  
335 negatively with the RNA expression of CCNF (upstream of PGP) (Figure 4E and F). As these  
336 two genes transcribe in opposite directions, they may share the same promoter. However, this  
337 region, despite being in PGP, showed negative correlation with only CCNF. Being a Cyclin, it is  
338 involved in regulating the progress through the cell cycle, but the exact function in this process  
339 of differentiation is not clear. We have also presented evidence that methylation of chromatin  
340 interaction partners also plays a crucial role for expression of genes in HL-60/S4 cells (Figure  
341 4).

342

343 [CEBPA downregulation and differential regulation of CEBPE expression are required of HL-  
344 60/S4 differentiation](#)

345 TSS methylation and RNA expression of key myeloid differentiation transcription factors SPI1,  
346 CEBPB, CEBPE, CREBBP, CEBPA, DNMTs and HDACs were examined. CEBPA was  
347 observed to be hyper-methylated in RA and TPA compared to UN cells (Figure S3). This  
348 resulted in significant downregulation of expression of CEBPA in the differentiated states  
349 compared to UN cells.

350

351 SPI1 and CEBPA, together with CEBPB are known to be required for the maintenance of CMP  
352 and GMP developmental stages of myeloid cells (Alvarez-Errico, et al., 2015). However, it is  
353 the counter-interaction between SPI1 and CEBPA transcription factors that decides whether a  
354 GMP differentiates or not (Iwasaki & Akashi, 2007), since CEBPA is known to repress

355 macrophage differentiation induced by SPI1. However, down-regulation of CEBPA expression  
356 in both RA and TPA suggests that it is significant in maintaining HL-60/S4 in the promyelocytic  
357 state. Thus, down-regulating CEBPA is key to macrophage differentiation; whereas, SPI1 is  
358 also expressed over 1.5-fold in both RA and TPA compared to UN cells.

359

360 Most of the other transcription factors necessary for the differentiation of macrophage and  
361 granulocytes are equally regulated by RA and TPA. An exception is CEBPE, which is  
362 upregulated in RA, but downregulated in TPA (Figure 4 A and B). This suggests that it is the  
363 downregulation of CEBPE which permits the differentiation of HL-60/S4 into the macrophage-  
364 like state.

365

366 Employing these observations, together with the data of Supplementary Figure S3, we have  
367 developed a model of the HL-60/S4 differentiation program based upon the transcription  
368 factors that may be required (Figure 5). In this model, we propose that down-regulation of  
369 CEBPA is necessary for differentiation of HL-60/S4 cells. Whereas, CEBPE is upregulated in  
370 the neutrophil-like state, its downregulation and the simultaneous upregulation of MAFB and  
371 GATA1 are necessary of macrophage-like differentiation. This supports the idea that CEBPE is  
372 necessary for the commitment of HL-60/S4 cells to a neutrophil-like state.

373

374 The upregulation in the expression of GATA1 and MAFB genes supports their role in  
375 committing HL-60/S4 cells to a macrophage-like state. We, therefore, postulate that HL-60/S4  
376 cells may only differentiate into a macrophage-like state upon down-regulation of CEBPA, in the  
377 absence of CEBPE.



## 378 **Conclusions**

379

380 The HL-60/S4 cell line is an excellent model system for myeloid leukemia and for cell  
381 differentiation studies, due to the capability of differentiating the (undifferentiated)  
382 promyelocytic cell line into macrophage-like and granulocyte-like states, following TPA and  
383 RA treatments, respectively. The 3 different states of this cell line show very high  
384 methylation levels for most CpGs, leaving only a few partially methylated or unmethylated  
385 CpGs. Genome wide DNA methylation analysis indicates that the methylation level of the  
386 granulocyte-like state differs only slightly from the undifferentiated form; whereas, the  
387 macrophage-like state is very different from the other two cell states.

388

389 We found 41,306 CpGs (of the  $\sim 26.7 \times 10^6$  measured CpGs) showed significant differential  
390 methylation upon differentiation of the HL-60/S4 cells, concentrated within a group  
391 characterized by very low to partially methylated CpGs. This is substantially fewer than the  
392 4.93 million dynamic CpGs involved in B-cell maturation, most of which were found in later  
393 stages of differentiation (Kulis *et al.*, 2015). Furthermore, since differentiation into the  
394 macrophage-like and granulocyte-like states is a branched set of events, only a few  
395 differentially methylated CpGs are shared between the diverged cell states. Hence, most of  
396 differentially methylated CpGs are specific to either macrophage-like or granulocyte-like  
397 differentiation.

398

399 Similarly, differential methylation was limited to the genomic features that overlapped with  
400 CpGs that are not fully methylated. This explains why regulatory genomic features such  
401 enhancers, CpG islands and protein-coding gene TSS were enriched, while epichromatin  
402 was highly depleted in the differentially methylated regions. This could also imply that once a  
403 CpG becomes methylated, it is more likely to remain methylated, which is consistent with  
404 observations in previous studies (Senner *et al.*, 2012).

405

406 A gene encoding a key transcription factor in the differentiation of myeloid cells (CEBPA)  
407 was hyper-methylated in both RA and TPA treated cells. Hyper-methylation of the promoter  
408 of this gene, however, negatively correlated with gene expression, implying repression of  
409 transcription of CEBPA in both the macrophage-like and granulocyte-like states. CEBPE, on  
410 the other hand, was hyper-methylated and expression was down-regulated only in the  
411 macrophage-like cell forms. This implies that down-regulation of CEBPE is required for  
412 macrophage development. Experiments involving CEBPE “knockout/knock-down” are  
413 required to examine whether down-regulation of CEBPA in HL-60/S4 cells will promote  
414 differentiation into a granulocyte-like state.

## 415 **Materials and Methods**

416

### 417 **Samples**

418 We used the human AML (acute myeloid leukemia) cell line HL-60/S4, available from ATCC  
419 (CRL-3306). Differentiation of this cell line was induced with retinoic acid (RA) and 12-O-  
420 tetradecanoylphorbol-13-acetate (TPA) to attain the granulocyte-like and macrophage-like  
421 states, as previously described (Mark Welch et al 2017). In previous publications (Mark  
422 Welch et al 2017, Teif et al 2017), the undifferentiated (UN) HL-60/S4 cells were denoted  
423 “0”. In the current study the same undifferentiated cells are denoted “UN”.

424

### 425 **Sequencing and library preparation**

426 Whole genome bisulphite sequencing (WGBS) libraries were prepared for untreated (UN),  
427 RA, and TPA treated HL-60/S4 cells. Libraries were prepared using the Illumina TruSeq  
428 DNA Sample Preparation Kit v2-set A (Illumina Inc., San Diego, CA, USA) according to  
429 manufacture guidelines. After the adapters were ligated to the library, they were treated with  
430 bisulphite followed by PCR amplification. Sequencing was performed on the Illumina HiSeq  
431 2000 using paired end mode with 101 cycles using standard Illumina protocols and the 200  
432 cycle TruSeq SBS Kit v3 (Illumina Inc., San Diego, CA, USA).

433

### 434 **Read alignment and methylation calling with BSMAP**

435 WGBS sequencing data were analysed using BsMAP (Xi and Li, 2009) and BisSNP  
436 packages. In brief, sequencing reads were adaptor-trimmed using CUTADAPT package  
437 (Martin, 2011), while read alignments were performed against the human reference genome  
438 (hg19 GRCh37 version hs37d5-lambda, 1000 Genomes) using the BsMAP-2.89 package  
439 with non-default parameter  $-v\ 8$  (Xi & Li, 2009). Putative PCR duplicates were filtered using  
440 Picard (version 1.61(1094) MarkDuplicates (<http://picard.sourceforge.net>). Only properly  
441 paired or singleton reads with minimum mapping quality score of  $\geq 30$  and bases with a  
442 Phred-scaled quality score of  $\geq 10$  were considered in methylation calling using the

443 BisulfiteGenotyper command. BisulfiteTableRecalibration was called with `–maxQ 40`.  
444 Methylation calling was done with BisSNP package (Liu, et al., 2012) and single-base-pair  
445 methylation rates (b-values) were determined by quantifying evidence for methylated  
446 (unconverted) and unmethylated (converted) cytosines at all CpG positions. Non-conversion  
447 rates were estimated using data from mitochondrion DNA (chrM). Only CpGs with coverage  
448 greater than or equal to 10x in all sample replicates were considered in downstream  
449 analysis.

450

#### 451 [Differentially methylated CpGs calling](#)

452 Fisher exact test with  $\alpha = 0.05$  was applied to all 17,233,911 CpGs individually to extract  
453 differentially methylated positions (DMPs).

454

#### 455 [Principal component analysis \(PCA\)](#)

456 Principal component analysis was done on all 17,233,911 CpGs using the `princomp`  
457 command in R.

458

#### 459 [Genomic features analysis](#)

460 We extracted genic features (intron, exons, intergenic regions, genes transcription start site  
461 (TSS)) together with 4D genomic interaction data from gencode v17 (Harrow *et al.*, 2012),  
462 CpG Island, Laminal Associated Domains (LADS) and RepeatMasker definitions from UCSC  
463 (Rosenbloom *et al.*, 2013). Using the start and end coordinates of the genes from  
464 Genecode17, TSS was defined as the region extending 2kb upstream and 1kb downstream  
465 the start of the gene. RepeatMaskers considered in the enrichment analysis are: DNA repeat  
466 elements (DNA), Long interspersed nuclear elements (LINE), Low complexity repeats, Long  
467 terminal repeats (LTR), Rolling Circle repeats (RC), RNA repeats (RNA, rRNA, scRNA,  
468 snRNA, srpRNA and tRNA), Satellite repeats, Simple repeats (micro-satellites) and Short  
469 interspersed nuclear elements (SINE). Enhancer were extracted from ENCODE (Dunham *et*

470 *al.*, 2012), FANTOM5 (Andersson *et al.*, 2017) and Vista (Visel *et al.*, 2007). Coordinates of  
471 HL-60/S4 Epichromatin are described (Olins *et al.*, 2014).

472

### 473 [Enrichment analysis](#)

474 Genomic feature and chromosome enrichment in the DMPs were estimated using the  
475 formula:

476

$$477 \text{DMP\_enrichment}_{\text{feature}} = (\text{overlap\_size} / \text{data\_size}) / (\text{feature\_size} / \text{genome\_size})$$

478

479 Where “*data\_size*” is the size of the data (for either RA or TPA DMPs) been used to  
480 calculate the enrichment. Note that the enrichment of the hyper and hypo-methylated DMPs  
481 were calculated relative to the “*data\_size*” or the total DMPs or DMRs called for each  
482 comparison but not relative to the total of only hyper or hypo-methylated DMPs or DMRs.

483

### 484 [Functional annotation](#)

485 DMR functional annotations was performed with DAVID 6.8 (Huang, Sherman and Lempicki,  
486 2009) using the full set of human genes as the background.

487

### 488 [Differential methylation patterns of DMPs analysis](#)

489 DMPs were clustered using the hclust (Murtagh, 1985) with the complete linkage method  
490 after the Euclidean distances were calculated using the dist function in R. The hierarchically  
491 clustered DMPs were divided into 12 clusters using cutree. The resulting clusters were  
492 named as modules, from module M1 to module M12.

493

494 Feature enrichment within modules were estimated using the following formula:

495

$$496 \text{Module\_enrichment}_{\text{feature}} = (\text{mod\_feature} / \text{feature\_size}) / (\text{module\_size} /$$

497 *total\_modules*)

498

499 Where “*mod\_feature*” is the size of a module overlapping with a specific genomic feature  
500 and “*feature\_size*” is total size of a genomic feature in all modules. Whereas “*module\_size*”  
501 is the total size of a module and “*total\_modules*” is the size of the all modules together.

502

### 503 [Extraction of differentially methylated regions \(DMRs\)](#)

504 DMR calling was done by first averaging coverage and number of methylation calls in a 3  
505 CpGs sliding windows with maximum size of 2kb. Fisher exact testing was done using an  
506 alpha value of 0.05 to extract differentially methylated windows. Continuous differentially  
507 methylated windows were merged into one and Fisher test with same conditions were  
508 applied the second time ensure the regions were significantly differentially methylated.  
509 Differentially methylated regions that had 3 CpGs /1kb ratio were extracted before applying  
510 the final filter which states that a DMR should consist of at least 3 sliding windows. This step  
511 was to eliminate regions that probably had only one truly differentially methylated CpGs. As  
512 such, DMRs that were made of less than 3 windows (5 CpGs) were dropped also dropped.

513

### 514 [Differential gene expression](#)

515 Differentially expressed genes data estimated using the RSEM software package (Li &  
516 Dewey, 2011) were obtained from our collaborators in The Josephine Bay Paul Center for  
517 Comparative Molecular Biology and Evolution (USA) (Mark Welch *et al.*, 2017).

518

### 519 [Correlation between gene expression and TSS methylation of HL-60/S4 genes](#)

520 Methylation and transcriptome data were integrated by first extracting genes with  $-\log_2$   
521 (RNA expression fold change)  $\geq 1.5$  and TSS overlapping with at least one DMP as  
522 extracted using the Fisher exact test. Using this criterion we identified 114 and 221 genes for  
523 RA and TPA respectively, summing up to a total of 280 unique differentially expressed  
524 genes.

525 Secondly, genes with TSS overlapping with DMPs with methylation rate difference  $\geq 0.2$   
526 were extracted for functional annotation analysis. In this extraction criterion 86 and 112  
527 genes were identified for RA and TPA respectively. The correlation between the average  
528 methylation change of DMPs overlapping with the TSS of a gene and the  $-\log_2$  (RNA  
529 expression fold change) were estimated for RA and TPA genes in a scatter plot. Similarly,  
530 correlation between the average methylation of DMPs overlapping with a gene TSS and the  
531 gene's expression were estimated using values from all samples and the distributions plotted  
532 separately for genes whose TSS overlap with RA and TPA DMPs.

533

534 Furthermore, the correlation between the methylation of individual CpGs in the gene body  
535 and TSS region and gene expression was estimated for all genes from both extraction  
536 criteria together with the gene expression of transcription factors known to be involved in  
537 myeloid cell differentiation (Figure 5).

538

### 539 **List of abbreviations**

540 HL-60/S4 – human myeloid leukemic cell line HL-60/S4 (ATCC CRL-3306).

541 UN – undifferentiated HL-60/S4

542 TPA – tetradecanoyl phorbol acetate treated HL-60/S4

543 CpG – Cytosine-phosphate-Guanine dinucleotide

544 CpGI – CpG island

545 DMP – differential methylated CpG position

546 DMR – differentially methylated CpG region

547 MPP – multipotent progenitor cells

548 CMP – common myeloid progenitor cells

549 GMP – granulocyte monocyte progenitor cells

550 MEP – megakaryocyte erythrocyte progenitor cell

551 WGBS – whole genome bisulphite sequencing

552 FISH – fluorescent in-situ hybridisation

553 M-FISH – multiplex FISH

554 LINE – long interspersed nuclear element

555 TSS – transcription start site

556 CHIA-PET – Chromatin interaction analysis by paired end tag sequencing

557 IM-PET – integrated method for predicted enhancer targets

558

### 559 **Author Contributions**

560 DEO, RE conceived the research. RE, DEO, NI supervised the study. ALO, DEO acquired  
561 the samples and data. EBA, NI, VT processed the data. EBA, VT, MB, TB, ZG, NI analysed  
562 data. All authors interpreted and discussed data. EBA, NI wrote the paper. All authors  
563 commented on and critically revised the manuscript.

564

### 565 **Acknowledgements**

566 We thank the DKFZ-Heidelberg Center for Personalized Oncology (DKFZ-HIPO) for  
567 technical support. We thank Anna Jauch for karyotyping the HL-60/S4 cells using M-FISH.  
568 We thank the College of Pharmacy (University of New England) for providing space and  
569 facilities to DEO and ALO, enabling the growth and characterization of HL-60/S4 cells.

570

### 571 **Competing interests**

572 No competing interests declared

573

### 574 **Funding**

575 ALO and DEO were Guest Scientists at the DKFZ Heidelberg, Germany) and recipients of  
576 support from the University of New England, College of Pharmacy.

577

### 578 **Data availability**

579 Raw sequencing data was deposited at the ENA under accession PRJEB27665.



580 Associated processing scripts and differential methylation analysis scripts are available via

581 [GitHub](#);

582 [https://github.com/jokergoo/ngspipeline/blob/master/WGBS\\_pipeline.pl](https://github.com/jokergoo/ngspipeline/blob/master/WGBS_pipeline.pl)

583 [https://github.com/eantwibo/HL60S4\\_methylation\\_scripts/](https://github.com/eantwibo/HL60S4_methylation_scripts/)

584 **References**

- 585 Álvarez-Errico, D., Vento-Tormo, R., Sieweke, M. and Ballestar, E. (2015). Epigenetic  
586 control of myeloid cell differentiation, identity and function. *Nature Reviews Immunology*.  
587 15(1), 7–17.
- 588 Andersson, R., Gebhard, C., Miguel-escalada, I., Hoof, I., Bornholdt, J., Boyd, M., Chen, Y.,  
589 Zhao, X., Schmidl, C., Suzuki, T., et. al. (2017). An atlas of active enhancers across human  
590 cell types and tissues. *Nature*. 507, 455–461.
- 591 Birnie, G. D. (1988). The HL60 cell line: a model system for studying human myeloid cell  
592 differentiation.. *The British journal of cancer*. 9, 41.
- 593 Bock, C., Beerman, I., Lien, W. H., Smith, Z. D., Gu, H., Boyle, P., Gnirke, A., Fuchs, E.,  
594 Rossi, D. J. and Meissner, A. (2012). DNA Methylation Dynamics during In Vivo  
595 Differentiation of Blood and Skin Stem Cells. *Molecular Cell*. 47, 633–647
- 596 Brenet, F., Moh, M., Funk, P., Feierstein, E., Viale, A. J., Socci, N. D. and Scandura, J. M.  
597 (2011). DNA methylation of the first exon is tightly linked to transcriptional silencing. *PLoS*  
598 *one*. 6, e14524.
- 599 Brunner, A. L., Johnson, D. S., Kim, S. W., Valouev, A., Reddy, T. E., Neff, N. F., Anton, E.,  
600 Medina, C., Nguyen, L., Chiao, E., et. al. (2009). Distinct DNA methylation patterns  
601 characterize differentiated human embryonic stem cells and developing human fetal liver.  
602 *Genome Res*. 19, 1044–1056.
- 603 Cheng, T., Shen, H., Giokas, D., Gere, J., Tenen, D. G. and Scadden, D. T. (1996).  
604 Temporal mapping of gene expression levels during the differentiation of individual primary  
605 hematopoietic cells.. *Proceedings of the National Academy of Sciences of the United States*  
606 *of America*, 93(23), 13158–13163.
- 607 Chuang, T.-J., Chen, F.-C. and Chen, Y.-Z. (2012). Position-dependent correlations between  
608 DNA methylation and the evolutionary rates of mammalian coding exons. *Proceedings of the*  
609 *National Academy of Sciences*, 109(39), 15841–15846.
- 610 Dunham, I., Kundaje, A., Aldred, S. F., Collins, P. J., Davis, C. A., Doyle, F., Epstein, C. B.,  
611 Fritze, S., Harrow, J., Kaul, R., et. al. (2012). An integrated encyclopedia of DNA elements

612 in the human genome. *Nature*, 489(7414), 57–74.

613 Fontana, J. A., Colbert, D. A. and Deisseroth, A. B. (1981). Identification of a population of  
614 bipotent stem cells in the HL60 human promyelocytic leukemia cell line. *Proceedings of the*  
615 *National Academy of Sciences*. 78 , 3863–3866.

616 Ford, E., Grimmer, M. R., , Sabine Stolzenburg , Ozren Bogdanovic, A. de, Mendoza,  
617 Farnham, P. J. and , Pilar Blancafort, R. L. (2017). Frequent lack of repressive capacity of  
618 promoter DNA methylation identified through genome-wide epigenomic manipulation.  
619 *bioRxiv* doi:[10.1101/170506](https://doi.org/10.1101/170506).

620 Geissmann, F., Manz, M. G., Jung, S., Sieweke, M. H., Merad, M. and Ley, K. (2010).  
621 Development of monocytes, macrophages, and dendritic cells. *Science*. 327 , 656–661.

622 Harrow, J., Frankish, A., Gonzalez, J. M., Tapanari, E., Diekhans, M. and Kokocinski, F.  
623 (2012). GENCODE: The Reference Human Genome Annotation for The ENCODE Project.  
624 *Genome Research*, 22, 1760–1774.

625 Huang, D. W., Sherman, B. T. and Lempicki, R. A. (2009). Systematic and integrative  
626 analysis of large gene lists using DAVID bioinformatics resources. *Nature Protocols*, 4(1),  
627 44–57.

628 Jones, P. A. (2012). Functions of DNA methylation: islands, start sites, gene bodies and  
629 beyond. *Nature Reviews Genetics*. 13(7), 484–492.

630 Kelly, T. K., Liu, Y., Lay, F. D., Liang, G., Berman, B. P. and Jones, P. A. (2012). Genome-  
631 wide mapping of nucleosome positioning and DNA methylation within individual DNA  
632 molecules. *Genome research*, 22(12), 2497–2506.

633 Kulis, M., Merkel, A., Heath, S., Queirós, A. C., Schuyler, R. P., Castellano, G., Duran-ferrer,  
634 M., Russiñol, N., Vilarrasa-blasi, R., Ecker, S., et. al. (2015). Whole-genome fingerprint of  
635 the DNA methylome during human B cell differentiation. *Nature genetics*. 47, 746-56.

636 Mark Welch, D. B., Jauch, A., Langowski, J., Olins, A. L. and Olins, D. E. (2017).  
637 Transcriptomes reflect the phenotypes of undifferentiated, granulocyte and macrophage  
638 forms of HL-60/S4 cells. *Nucleus*, 8(2), 222–237.

639 Martin, M. (2011). Cutadapt removes adapter sequences from high-throughput sequencing

640 reads. *EMBNet.journal*. <https://doi.org/10.14806/ej.17.1.200>

641 McLean, C. Y., Bristor, D., Hiller, M., Clarke, S. L., Schaar, B. T., Lowe, C. B., Wenger, A. M.  
642 and Bejerano, G. (2010). GREAT improves functional interpretation of cis-regulatory regions.  
643 *Nature biotechnology*. 28(5), 495–501.

644 Murtagh, F. (1985) “*Multidimensional Clustering Algorithms*”, in *COMPSTAT Lectures 4*.  
645 *Wuerzburg: Physica-Verlag*.

646 Le Naour, F., Hohenkirk, L., Grolleau, A., Misek, D. E., Lescure, P., Geiger, J. D., Hanash,  
647 S. and Beretta, L. (2001). Profiling Changes in Gene Expression during Differentiation and  
648 Maturation of Monocyte-derived Dendritic Cells Using Both Oligonucleotide Microarrays and  
649 Proteomics. *Journal of Biological Chemistry*, 276(21), 17920–17931.

650 Natarajan, A., Yardimci, G. G., Sheffield, N. C. and Frazer, K. (2012). Predicting cell-type –  
651 specific gene expression from regions of open chromatin the genome. *Genome Research*.  
652 22, 1711–1722.

653 Olins, A. L., Ishaque, N., Chotewutmontri, S., Langowski, J. and Olins, D. E. (2014).  
654 Retrotransposon Alu is enriched in the epichromatin of HL-60 cells. *Nucleus*. 5, 237–246.

655 Ong, C.-T. and Corces, V. G. (2011). Enhancer function: new insights into the regulation of  
656 tissue- specific gene expression. *Nature Reviews Genetics*, 12(4), 283–293.

657 Payer, B., Lee, J. T., Ge, B., Kwan, T., Pastinen, T., Blanchette, M., Payer, B., Lee, J.,  
658 Yoder, J., Walsh, C., et. al. (2008). X Chromosome Dosage Compensation: How Mammals  
659 Keep the Balance. *Annual Review of Genetics*, 42(1), 733–772.

660 Roadmap Epigenomics Consortium, Kundaje, A., Meuleman, W., Ernst, J., Bilenky, M., Yen,  
661 A., Heravi-Moussavi, A., Kheradpour, P., Zhang, Z., Wang, J., et. al. (2015). Integrative  
662 analysis of 111 reference human epigenomes. *Nature*, 518(7539), 317–329.

663 Rosenbloom, K. R., Sloan, C. A., Malladi, V. S., Dreszer, T. R., Learned, K., Kirkup, V. M.,  
664 Wong, M. C., Maddren, M., Fang, R., Heitner, S. G., et. al. (2013). ENCODE Data in the  
665 UCSC Genome Browser: Year 5 update. *Nucleic Acids Res.* 41, D56–63.

666 Senner, C. E., Krueger, F., Oxley, D., Andrews, S. and Hemberger, M. (2012). DNA  
667 methylation profiles define stem cell identity and reveal a tight embryonic-extraembryonic

668 lineage boundary. *Stem Cells*, 30(12), 2732–2745.

669 Teif, V. B., Mallm, J., Sharma, T., Welch, D. B. M., Rippe, K., Eils, R., Langowski, J., Olins,  
670 A. L., Olins, D. E., Teif, V. B., Mallm, J., Sharma, T., Welch, D. B. M., Rippe, K., Eils, R.,  
671 Langowski, J., Olins, A. L. and Nucleosome, D. E. O. (2017). Nucleosome repositioning  
672 during differentiation of a human myeloid leukemia cell line. *Nucleus*. 8, 188–204.

673 Teng, L., He, B., Wang, J. and Tan, K. (2015). 4DGenome: A comprehensive database of  
674 chromatin interactions. *Bioinformatics*, 31(15), 2560–2564.

675 Visel, A., Minovitsky, S., Dubchak, I. and Pennacchio, L. A. (2007). VISTA Enhancer  
676 Browser - A database of tissue-specific human enhancers. *Nucleic Acids Res.* 35, D88–92.

677 Xi, Y. and Li, W. (2009). BSMAP: whole genome bisulfite sequence MAPping program. *BMC*  
678 *bioinformatics*. 10, 232.

679 Yang, X., Han, H., DeCarvalho, D. D., Lay, F. D., Jones, P. A. and Liang, G. (2014). Gene  
680 body methylation can alter gene expression and is a therapeutic target in cancer. *Cancer*  
681 *Cell*. 26, 577–590.

## 682 **Figure Legends**

683 Figure 1: Analysis of DNA methylome upon chemical induction of differentiation of HL-60/S4  
684 cells. A. Whole genome CpG methylation rate density plot. B. Box plots summarising the  
685 distribution of CpG methylation rates per sample replicates for the ~22 million CpGs with  
686 coverage greater than or equal to 10x in all samples. The upper and lower limits of the boxes  
687 represent the first and third quartiles respectively, and the black horizontal line is the median.  
688 The whiskers indicate the variability outside the upper and lower quartiles. C. Principal  
689 component analysis of the WGBS data for the three treated samples. D. Circular  
690 representation of DNA methylation rates for the different treatments. CpG methylation rates  
691 were averaged over 10-Mb windows and are presented as heat map tracks. The heat maps  
692 show the DNA methylation change with respect to the sample in the next inner track.

693

694 Figure 2: Differentially methylated CpGs (DMPs) analysis. A. Number of DMPs identified  
695 with Fisher exact test for each comparison. RA and TPA are the DMPs identified when RA or  
696 TPA was compared to the control (UN), while RA vs TPA is the comparison in which RA was  
697 compared to TPA. B. Enrichment of genomic features in the hyper-methylated (left) and  
698 hypo-methylated (right) DMPs in RA and TPA, compared UN cells. C. The density plot of the  
699 methylation rates of DMPs. Hyper and hypo-methylated DMPs are denoted by (hyper) and  
700 (hypo) respectively. On the left and right panels show the distribution of DMPs identified in  
701 the RA and TPA compared to UN cells respectively. D. Modules identified from the  
702 unsupervised clustering of the DMPs. E. Genomic feature enrichment in the 12 modules  
703 identified. F. Enrichment of genomic features in the 12 identified modules.

704

705 Figure 3: Correlation between TSS methylation and gene expression A. The scatter plot of  
706 TSS DMPs methylation change and fold change of RNA expression values ( $-\log_2$   
707 transformed) for genes which had their TSS overlapping with DMPs with 0.2 methylation  
708 difference between RA and UN cells. B. The distribution of Pearson correlation coefficient  
709 values between the average methylation of DMPs overlapping with TSS and expression

710 intensity for the genes with differentially methylated TSS in RA relative to UN cells. C. The  
711 scatter plot of TSS DMPs methylation change and fold change of expression values (-log<sub>2</sub>  
712 transformed) for genes which had their TSS overlapping with DMPs with 0.2 methylation  
713 difference between TPA and UN cells. D. The distribution of Pearson correlation coefficient  
714 values between the average methylation of DMPs overlapping with TSS and expression  
715 intensity for the genes with differentially methylated TSS in TPA relative to UN cells.

716

717 Figure 4: Gene expression integration with CpG differential methylation shows that CEBPE  
718 expression is regulated by methylation of downstream region. A. The promoter region of  
719 CEBPE gene shows a strong inverse correlation between expression and methylation of  
720 DMPs in its downstream region. Top panel: the interacting regions are regions identified  
721 with IM-PET in K562 cells and confirmed by CHIA-PET. Second panel shows genomic  
722 coordinates of CEBPE gene on chromosome 14 whereas E029 chromHMM panel shows the  
723 genomic features along the CEBPE gene in E029 (primary monocyte cells from peripheral  
724 blood). Correlation panel shows the correlation of between DMPs along the genomic  
725 coordinates and the gene expression of CEBPE for all three states. Methylation panel shows  
726 the methylation rate of CpGs along the gene coordinates +/- 2kb. B-D. The expression of  
727 CEBPE (B), PGP (C) and (CCNF) for the three different states. E, F. The cyclin-F-box  
728 protein coding gene CCNF interacts with a distant upstream region which regulated its  
729 expression through methylation. Panel description is similar to figure 4A except the  
730 "correlation" panel in 4E which depicts the correlation between the methylation of CpGs  
731 along the PGP gene coordinates and the expression of CCNF. The sequence panel shows  
732 the nucleotide sequence of in the differentially methylated region upstream PGP (enhancer  
733 region): DMPs are marked in the sequence panel by \*\* while the blue arrows points to TPA-  
734 specific SNP sites within the differentially methylated region. 4F shows similar information  
735 depicted in 4A for CCNF gene. The interaction between the CCNF promoter and the region  
736 upstream PGP was also identified by ChIA-PET in the K562 cell line.

737

738 Figure 5: Chemical differentiation model of HL-60/S4 showing the transcription factors that  
739 may play an essential role in determining cell fate. Downregulation or upregulation of gene  
740 expression are denoted by “-“ or “+” respectively. Genes with no sign attach implies their  
741 levels are maintained at similar levels as in UN (promyelocytic) state.



742 **Tables and table legends**

743

|                      | <b>UN</b>        | <b>RA</b>     | <b>TPA</b>                       |
|----------------------|------------------|---------------|----------------------------------|
| Treatment            | None             | Retinoic acid | tetradecanoyl phorbol<br>acetate |
| State                | Undifferentiated | Granulocyte   | Macrophage                       |
| Measured CpGs        | 26,681,926       | 26,681,926    | 26,647,233                       |
| Genome coverage (x)  | 28.87            | 29.43         | 27.56                            |
| CpG coverage (x)     | 21.90            | 22.60         | 20.20                            |
| ChrM conversion rate | 0.999            | 0.999         | 0.998                            |

744

745 Table 1: CpG coverage statistics. A summary of the whole genome bisulphite sequencing

746 (WGBS) data for the undifferentiated HL-60/S4 (UN), and retinoic acid (RA) and

747 tetradecanoyl phorbol acetate (TPA) treated cells.

748

749

| <b>Term</b>                                 | <b>%</b> | <b>Enrichment</b> | <b>PValue</b> |
|---------------------------------------------|----------|-------------------|---------------|
| Glycoprotein binding                        | 3.85     | 19.86             | 0.01          |
| Translation                                 | 7.69     | 4.46              | 0.01          |
| Defence response                            | 10.26    | 3.2               | 0.01          |
| Immunoglobulin-like V-type domain           | 5.13     | 8.01              | 0.01          |
| Signal peptide                              | 26.92    | 1.6               | 0.03          |
| Steroid binding                             | 3.85     | 11.48             | 0.03          |
| Protein biosynthesis                        | 5.13     | 5.32              | 0.04          |
| Lipoprotein                                 | 8.97     | 2.72              | 0.04          |
| Positive regulation of cell migration       | 3.85     | 8.29              | 0.05          |
| Peroxisome                                  | 3.85     | 8.33              | 0.05          |
| Enzyme binding                              | 7.69     | 2.81              | 0.06          |
| Positive regulation of locomotion           | 3.85     | 7.53              | 0.06          |
| Endocytosis signal motif                    | 2.56     | 27.58             | 0.07          |
| Defence response to Gram-positive bacterium | 2.56     | 24.6              | 0.08          |
| Ankyrin                                     | 5.13     | 3.94              | 0.08          |
| Phospholipid catabolic process              | 2.56     | 22.36             | 0.08          |
| Cell membrane                               | 17.95    | 1.59              | 0.09          |
| SH2 domain binding                          | 2.56     | 20.41             | 0.09          |
| Locomotory behavior                         | 5.13     | 3.59              | 0.1           |
| Structure of Caps and SMACs                 | 2.56     | 14.92             | 0.1           |

750

751 Table 2: Immune response related functions are predominant in cellular functions of genes  
752 with the most differentially methylated TSS in RA, compared to UN cells. The functional  
753 annotation of genes with their TSS overlapping with DMPs, with a methylation rate difference  
754  $\geq 0.2$  in RA, compared to UN cells, for which gene expression data was available. The p-

755 value is the calculated hypergeometric binomial calculated in DAVID.

756

| <b>Term</b>                               | <b>%</b> | <b>Enrichment</b> | <b>PValue</b> |
|-------------------------------------------|----------|-------------------|---------------|
| Defense response                          | 11.43    | 3.47              | 0             |
| Phosphatase activity                      | 5.71     | 4.29              | 0.01          |
| Positive regulation of locomotion         | 3.81     | 7.27              | 0.02          |
| Chemotaxis                                | 5.71     | 3.9               | 0.02          |
| Peroxisome                                | 3.81     | 7.09              | 0.02          |
| Leukocyte transendothelial migration      | 3.81     | 5.75              | 0.03          |
| Opsonization                              | 1.9      | 59.33             | 0.03          |
| Immunoglobulin-like fold                  | 7.62     | 2.59              | 0.03          |
| Translation                               | 5.71     | 3.23              | 0.04          |
| Immune response                           | 8.57     | 2.32              | 0.04          |
| RNA binding                               | 8.57     | 2.23              | 0.04          |
| Steroid binding                           | 2.86     | 8.34              | 0.05          |
| Phosphoprotein                            | 44.76    | 1.23              | 0.06          |
| Intracellular protein transport           | 5.71     | 2.86              | 0.06          |
| p53 signalling pathway                    | 2.86     | 7.48              | 0.06          |
| MAPK signalling pathway                   | 4.76     | 3.17              | 0.06          |
| Positive regulation of phagocytosis       | 1.9      | 29.67             | 0.06          |
| Regulation of leukocyte activation        | 3.81     | 4.29              | 0.06          |
| Zinc finger region:C3H1                   | 1.9      | 29.11             | 0.07          |
| Protein biosynthesis                      | 3.81     | 4.05              | 0.07          |
| Signal peptide                            | 22.86    | 1.4               | 0.08          |
| Regulation of apoptosis                   | 8.57     | 1.99              | 0.08          |
| Macrophage activation                     | 1.9      | 23.73             | 0.08          |
| Small GTPase mediated signal transduction | 4.76     | 2.92              | 0.09          |
| Calcium-binding                           | 1.9      | 21.03             | 0.09          |

|                             |      |       |      |
|-----------------------------|------|-------|------|
| Antimicrobial               | 3.81 | 3.69  | 0.09 |
| Cell cycle                  | 5.71 | 2.48  | 0.09 |
| Cytoskeleton organization   | 5.71 | 2.45  | 0.09 |
| Structure of Caps and SMACs | 1.9  | 14.92 | 0.1  |
| Palmitate moiety binding    | 3.81 | 3.58  | 0.1  |

757

758 Table 3: Immune response related functions are predominant in cellular functions of genes  
759 with the most differentially methylated TSS in TPA compared to UN cells. The functional  
760 annotation of genes with their TSS overlapping with DMPs with a methylation rate difference  
761  $\geq 0.2$  in TPA, compared to UN for which gene expression data was available. The p-value is  
762 the calculated hypergeometric binomial calculated in DAVID.

763

764

765

766

| <b>Term</b>                                          | <b>n</b> | <b>Enrichment</b> | <b>BinomP</b> |
|------------------------------------------------------|----------|-------------------|---------------|
| Peroxisome proliferator activated receptor pathway   | 2        | 30.84             | 4.76E-05      |
| Catabolic process                                    | 40       | 1.59              | 3.70E-04      |
| Phagocytosis                                         | 7        | 3.88              | 5.84E-04      |
| Organic substance catabolic process                  | 34       | 1.51              | 1.65E-03      |
| Cellular catabolic process                           | 31       | 1.50              | 2.02E-03      |
| Organelle organization                               | 40       | 1.38              | 2.99E-03      |
| Protein folding                                      | 6        | 2.28              | 3.97E-03      |
| Organophosphate catabolic process                    | 13       | 2.08              | 4.29E-03      |
| Regulation of cholesterol transport                  | 3        | 7.23              | 4.47E-03      |
| Cell division                                        | 12       | 2.09              | 4.61E-03      |
| Leukocyte migration involved in immune response      | 1        | 38.55             | 5.22E-03      |
| Quinolate metabolic process                          | 2        | 25.70             | 5.27E-03      |
| Positive regulation of calcium-mediated signalling   | 3        | 9.64              | 5.32E-03      |
| Mitochondrion degradation                            | 2        | 22.03             | 5.67E-03      |
| Histone H4-K acetylation                             | 2        | 11.86             | 5.88E-03      |
| Nucleotide catabolic process                         | 12       | 2.10              | 6.05E-03      |
| Retinoic acid receptor signalling pathway            | 2        | 8.57              | 6.27E-03      |
| Nucleoside phosphate catabolic process               | 12       | 2.07              | 6.37E-03      |
| Purinergic nucleotide receptor signalling pathway    | 2        | 8.12              | 7.28E-03      |
| Neurotransmitter metabolic process                   | 3        | 8.90              | 7.58E-03      |
| Heterocycle catabolic process                        | 16       | 1.60              | 8.25E-03      |
| Regulation of ER to Golgi vesicle-mediated transport | 2        | 25.70             | 9.02E-03      |
| Aromatic compound catabolic process                  | 16       | 1.59              | 9.55E-03      |
| Organonitrogen compound metabolic process            | 31       | 1.55              | 9.79E-03      |

768 Table 4: Cellular functions of DMRs which were generated by merging DMPs. The biological  
769 process enrichment was performed with DMRs generated from TPA-UN comparison DMPs.  
770 The p-value is the calculated binomial calculated by GREAT (McLean *et al.*, 2010).  
771

| <b>Term</b>                                              | <b>n</b> | <b>Enrichment</b> | <b>P value</b> |
|----------------------------------------------------------|----------|-------------------|----------------|
| Regulation of defense response                           | 53       | 1.76              | 1.1E-10        |
| Endocytosis                                              | 50       | 2.14              | 3.8E-10        |
| Negative regulation of interleukin-8 production          | 5        | 12.93             | 6.5E-08        |
| Regulation of inflammatory response                      | 27       | 1.98              | 1.3E-07        |
| Negative regulation of protein modification process      | 44       | 1.88              | 1.1E-06        |
| Negative regulation of transferase activity              | 27       | 2.15              | 1.1E-06        |
| Immune response-activating signal transduction           | 36       | 1.95              | 1.2E-06        |
| Activation of immune response                            | 38       | 1.75              | 2.4E-06        |
| Positive regulation of defense response                  | 31       | 2.05              | 3.1E-06        |
| Negative regulation of protein kinase activity           | 25       | 2.23              | 3.6E-06        |
| Negative regulation of kinase activity                   | 26       | 2.19              | 5.7E-06        |
| Negative regulation of phosphorylation                   | 35       | 2.23              | 8.1E-06        |
| Negative regulation of protein phosphorylation           | 34       | 2.30              | 9.0E-06        |
| Platelet activation                                      | 29       | 2.10              | 1.6E-05        |
| Regulation of peptidase activity                         | 38       | 1.71              | 1.9E-05        |
| Toll-like receptor 5 signalling pathway                  | 12       | 2.86              | 2.5E-05        |
| Toll-like receptor 10 signalling pathway                 | 12       | 2.86              | 2.5E-05        |
| Response to lipoprotein particle stimulus                | 5        | 7.76              | 6.5E-05        |
| Positive regulation of histone H4 acetylation            | 3        | 15.51             | 8.0E-05        |
| Positive regulation of myeloid leukocyte differentiation | 9        | 3.58              | 1.1E-04        |
| Response to low-density lipoprotein particle stimulus    | 4        | 10.34             | 1.3E-04        |
| Regulation of cysteine-type endopeptidase activity       | 25       | 2.03              | 2.3E-04        |
| Regulation of meiosis                                    | 8        | 4.77              | 2.5E-04        |
| Positive regulation of behaviour                         | 16       | 2.73              | 3.2E-04        |
| Regulation of meiotic cell cycle                         | 8        | 4.00              | 5.2E-04        |



|                                            |    |       |         |
|--------------------------------------------|----|-------|---------|
| Response to estrogen stimulus              | 20 | 2.30  | 7.7E-04 |
| Positive regulation of histone acetylation | 6  | 5.82  | 1.1E-03 |
| Negative regulation of glycolysis          | 4  | 12.41 | 1.4E-03 |

772

773 Table 5: Cellular functions of DMRs which were generated by merging DMPs. The biological

774 process enrichment was performed with DMRs generated from TPA-UN comparison DMPs.

775 The p-value is the calculated binomial calculated by GREAT (McLean *et al.*, 2010).

776 **Supplementary figures**

777 Supplementary figure S1: Genome of HL60/S4 is stable over long time and upon  
778 differentiation: Coverage plots of the WGBC data for UN (A), RA (B), and TPA (C) depicting  
779 stable genome during differentiation. D and E show 2 examples of M-FISH of  
780 undifferentiated HL-60/S4 over a period of 4 years depicting stability of the genome.

781

782 Supplementary figure S2: Average nucleosome occupancy around DMP of the different  
783 modules as described in figure 2. Each image shows nucleosome occupancy 2000 bases  
784 up- and downstream of DMPs per module. Nucleosome occupancy is shown in black, red  
785 and blue for untreated, RA and TPA treated respectively. GC content refers to the  
786 percentage of GC at each base relative to the DMP position.

787

788 Supplementary figure S3: Key myeloid differentiation transcription factors are differentially  
789 methylated and expressed during expression. DNA methylation landscape and gene  
790 expression of transcription factors know to play important role in myeloid differentiation.  
791 Gene expression levels for the three differentiation states as shown in the blue bar plots  
792 correspond with the methylation and correlation profiles on their left.

793

794

795 **Supplementary tables**

|                         | <b>UN</b>     | <b>RA</b>     | <b>TPA</b>    |
|-------------------------|---------------|---------------|---------------|
| QC-passed reads         | 1,075,185,936 | 1,070,133,636 | 1,096,718,018 |
| Read pairs              | 453,160,937   | 453,160,937   | 433,631,362   |
| Unpaired reads          | 37,984,963    | 37,984,963    | 36,188,487    |
| Unmapped reads (%)      | 12            | 10            | 18            |
| Duplicates (%)          | 4             | 4             | 4             |
| Genome-wide coverage(x) | 28.87         | 29.43         | 27.56         |
| CpGs identified         | 26681926      | 26699651      | 26647233      |
| CpG coverage            | 21.9          | 22.6          | 20.2          |
| ChrM conversion         | 0.998761      | 0.999071      | 0.998135      |

796

797 Supplementary table ST1: Read and alignment statistics of the whole genome bisulphite

798 sequencing data used in this study.

799

800 Supplementary tables ST1-ST13: enrichment of GO molecular function terms in modules

801 M1-M12

802 [Submitted as an EXCEL file]

803

804 Supplementary table ST14: enrichment of GO biological process terms in module M6

805 [Submitted as an EXCEL file]

806

807

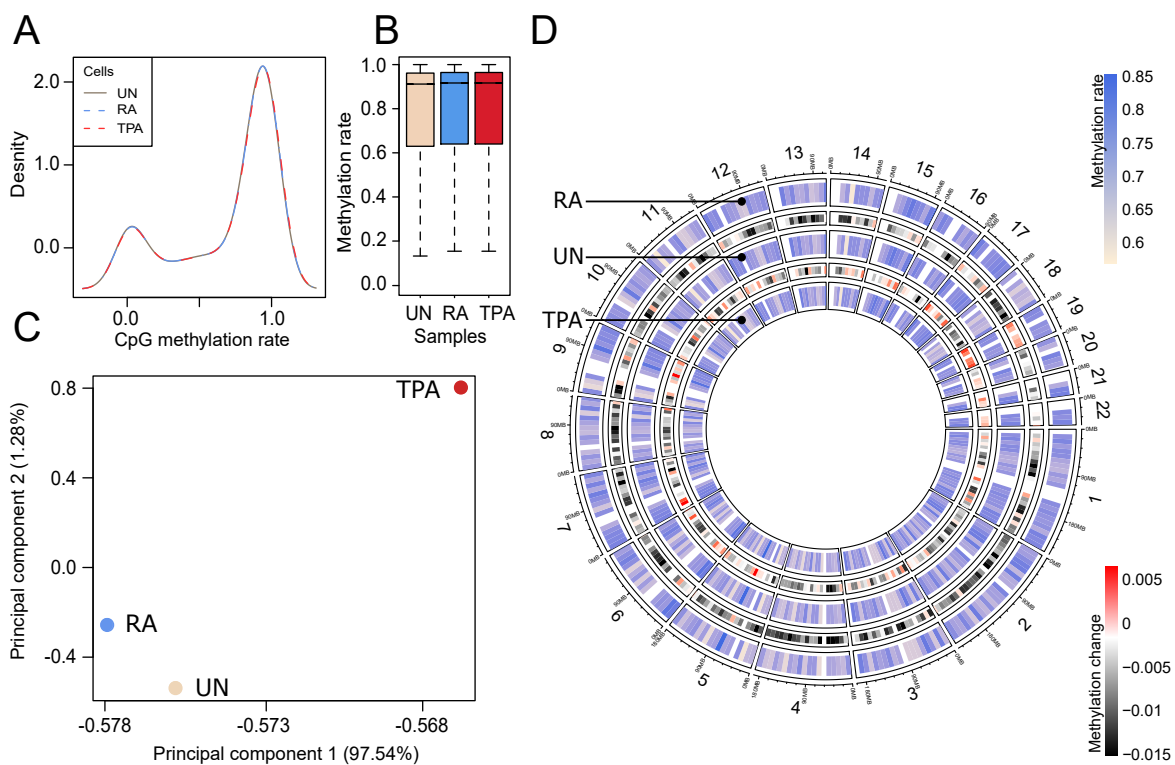

Figure 1

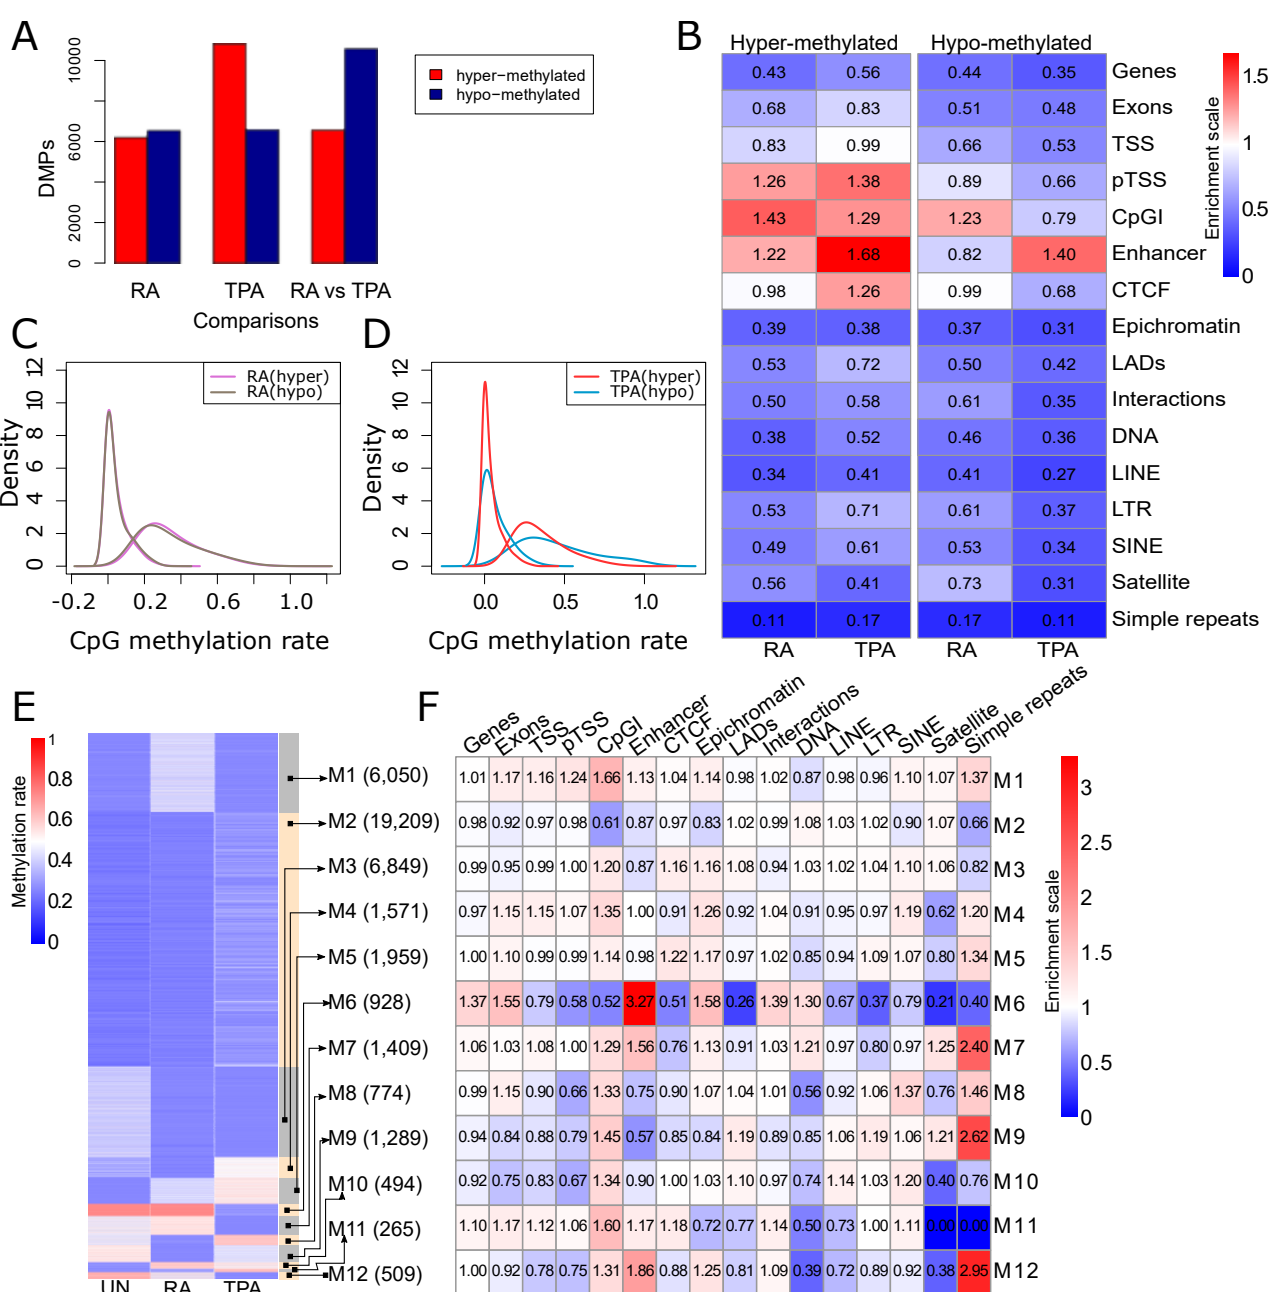

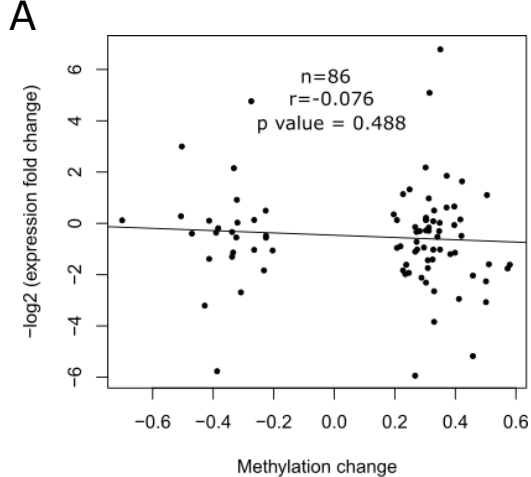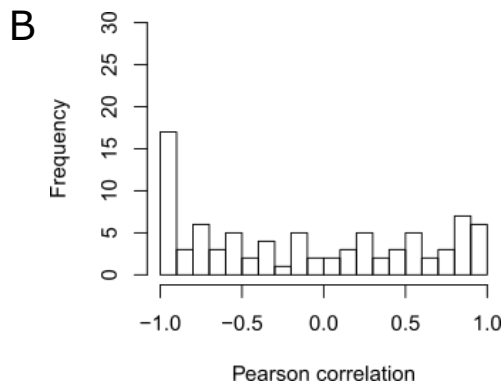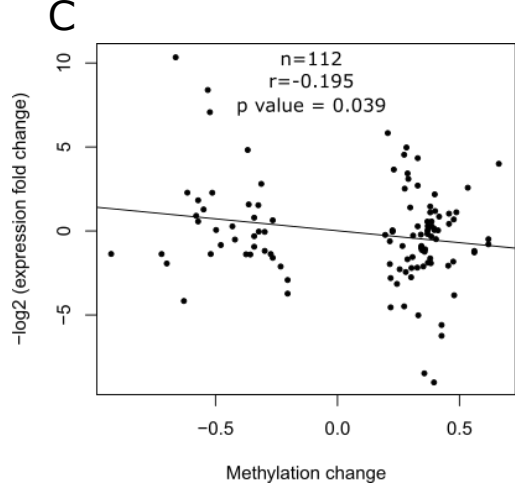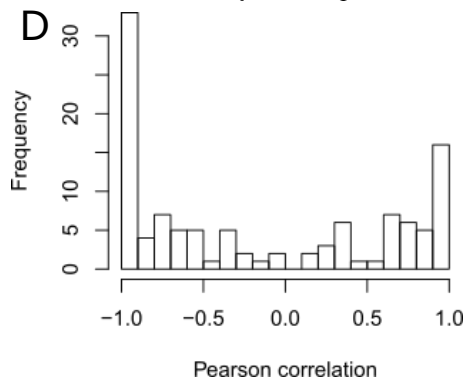

Figure 3

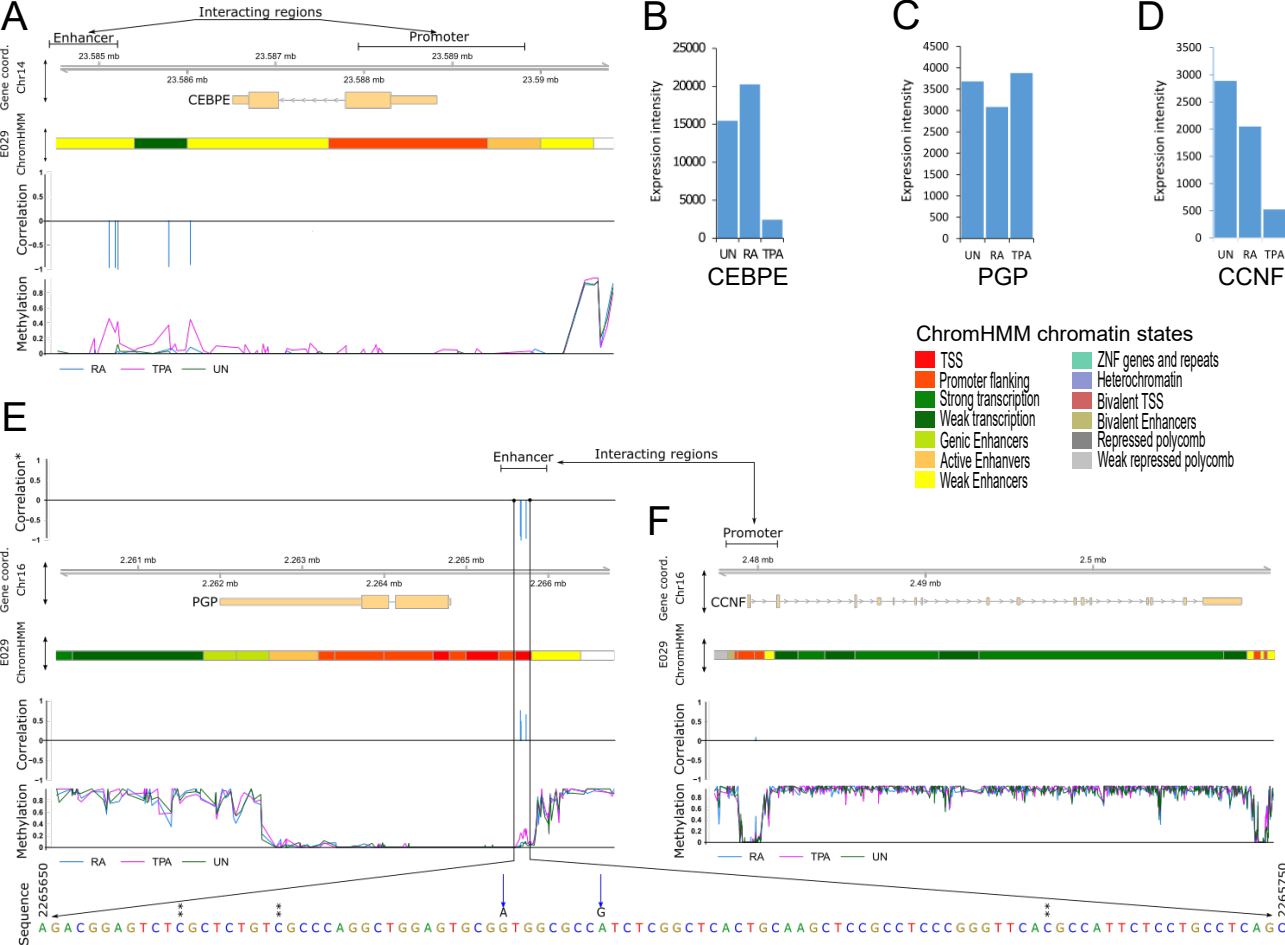

Figure 4



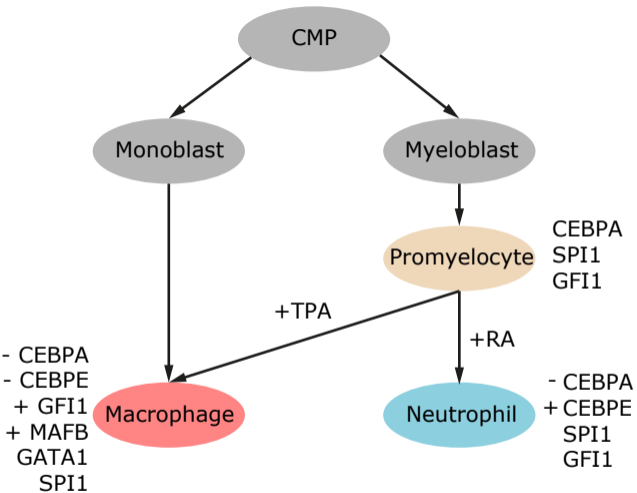

Figure 5
